# Supplementary material
Source: MDPI journal article supplement (https://www.mdpi.com/1424-8247/14/6/576)
Supplement: s1 [file s1]

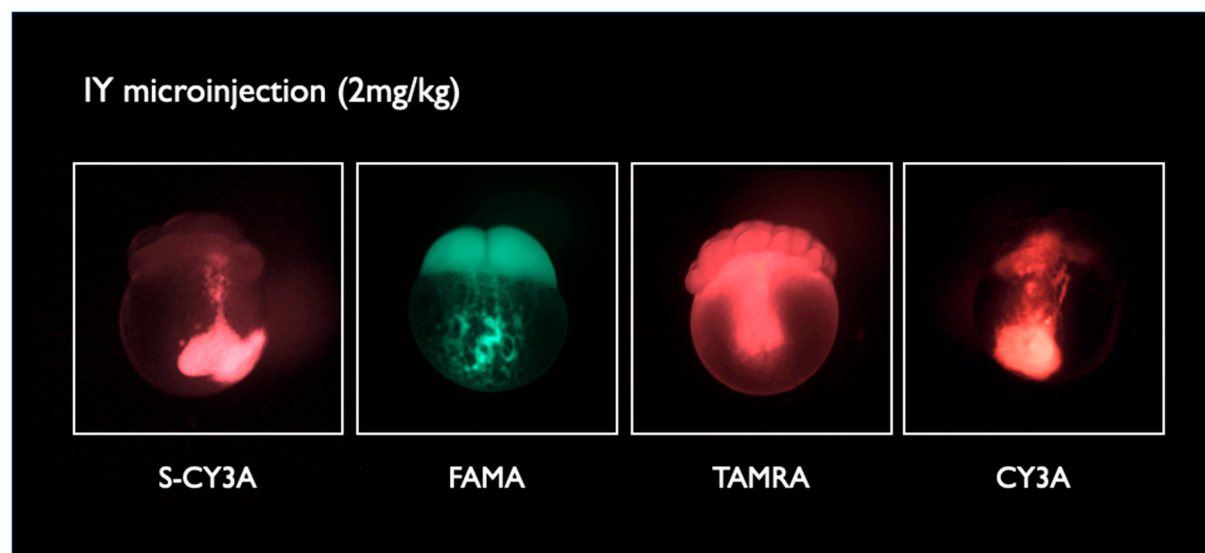

**Supplementary Material Figure S1.** Representative images of embryos showing the flow of some fluorescent dyes from the yolk (bottom) to the proliferating embryonic cells (top) after intrayolk microinjections (2 mg/kg) in compounds S-CY3A (1 h), FAMA (0.25 h) , TAMRA (1 h), and CY3A (1 h).
